# Supplementary material for: The UCHL5 inhibitor b-AP15 overcomes cisplatin resistance via suppression of cancer stemness in urothelial carcinoma
Source: PubMed Central journal article supplement — Mol Ther Oncolytics. 2022 Aug 5;26:387–98. doi: 10.1016/j.omto.2022.08.004 (PMC9421311; doi:10.1016/j.omto.2022.08.004), 2022-08-05
Supplement: mmc1.pdf [file mmc1.pdf]

**OMTO, Volume 26**

**Supplemental information**

**The UCHL5 inhibitor b-AP15 overcomes  
cisplatin resistance via suppression  
of cancer stemness in urothelial carcinoma**

**Po-Ming Chow, Jun-Ren Dong, Yu-Wei Chang, Kuan-Lin Kuo, Wei-Chou Lin, Shing-Hwa Liu, and Kuo-How Huang**

**Table S1. List of primer sequences used for real-time quantitative PCR analysis.**

|                      |                              |
|----------------------|------------------------------|
| <i>GAPDH</i> Forward | 5'-GCATTGCCCTCAACGAC-3'      |
| <i>GAPDH</i> Reverse | 5'-GTCTCTCTCTTCCTCTTGTGC-3'  |
| <i>MYC</i> Forward   | 5'-TGTCCGTCCAAGCAGAGGAGCA-3' |
| <i>MYC</i> Reverse   | 5'-TCAGCCAAGGTTGTGAGGTTGC-3' |

**Table S2. CI for experimental values in BFTC905 cells**

| <b>b-AP15(nM)</b> | <b>Cisplatin (nM)</b> | <b>Fraction Affected (Fa)</b> | <b>Combination Index (CI)</b> |
|-------------------|-----------------------|-------------------------------|-------------------------------|
| 62.5              | 625                   | 0.18                          | 0.750                         |
| 125               | 1250                  | 0.32                          | 0.725                         |
| 250               | 2500                  | 0.49                          | 0.749                         |
| 500               | 5000                  | 0.65                          | 0.827                         |
| 750               | 7500                  | 0.68                          | 1.099                         |

**Table S3. CI for experimental values in T24 cells**

| <b>b-AP15(nM)</b> | <b>Cisplatin (nM)</b> | <b>Fraction Affected (Fa)</b> | <b>Combination Index (CI)</b> |
|-------------------|-----------------------|-------------------------------|-------------------------------|
| 100               | 1500                  | 0.28                          | 0.669                         |
| 150               | 2250                  | 0.40                          | 0.803                         |
| 200               | 3000                  | 0.62                          | 0.755                         |
| 250               | 3750                  | 0.73                          | 0.783                         |
| 300               | 4500                  | 0.75                          | 0.905                         |

**Table S4. CI for experimental values in T24/R cells**

| <b>b-AP15(nM)</b> | <b>Cisplatin (nM)</b> | <b>Fraction Affected (Fa)</b> | <b>Combination Index (CI)</b> |
|-------------------|-----------------------|-------------------------------|-------------------------------|
| 250               | 3750                  | 0.24                          | 0.748                         |
| 500               | 7500                  | 0.41                          | 0.646                         |
| 750               | 11250                 | 0.46                          | 0.781                         |
| 1000              | 15000                 | 0.51                          | 0.843                         |
| 1250              | 18750                 | 0.53                          | 0.968                         |

**Table S5. CI for experimental values in RT4 cells**

| <b>b-AP15(nM)</b> | <b>Cisplatin (nM)</b> | <b>Fraction Affected (Fa)</b> | <b>Combination Index (CI)</b> |
|-------------------|-----------------------|-------------------------------|-------------------------------|
| 100               | 1500                  | 0.28                          | 0.669                         |
| 150               | 2250                  | 0.40                          | 0.803                         |
| 200               | 3000                  | 0.62                          | 0.755                         |
| 250               | 3750                  | 0.73                          | 0.783                         |
| 300               | 4500                  | 0.75                          | 0.905                         |

**Table S6.**

RNA sequencing data from DMSO or b-AP15-treated T24/R cells was analyzed via gene set enrichment analysis (GSEA). Target genes enrichment scores of the GSEA FEVR\_CTNNB1\_TARGETS\_DN were listed in this heatmap. This table is attached in "Supplemental Spreadsheet".

**Figure S1**

**b-AP15 (nM)**

**BFTC905**

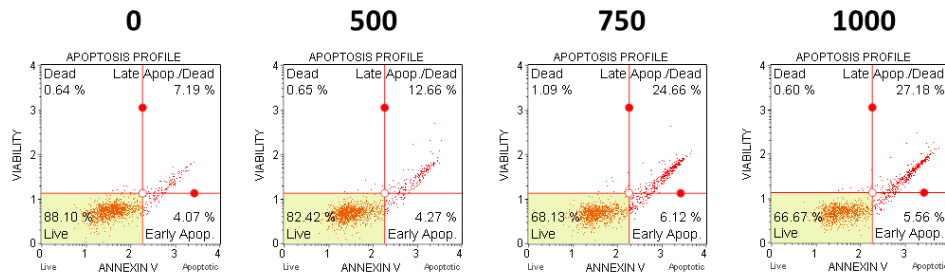

**b-AP15 (nM)**

**T24**

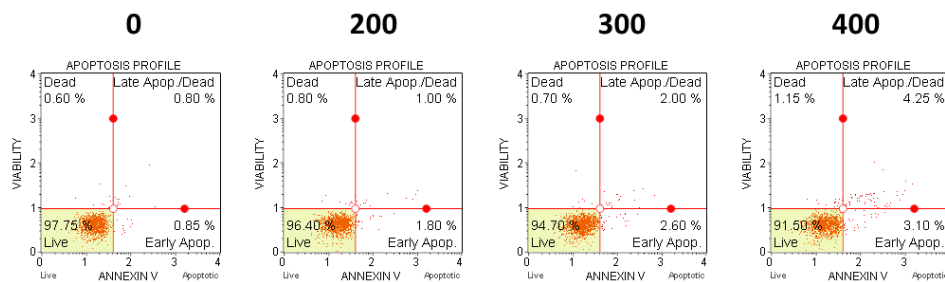

**b-AP15 (nM)**

**T24/R**

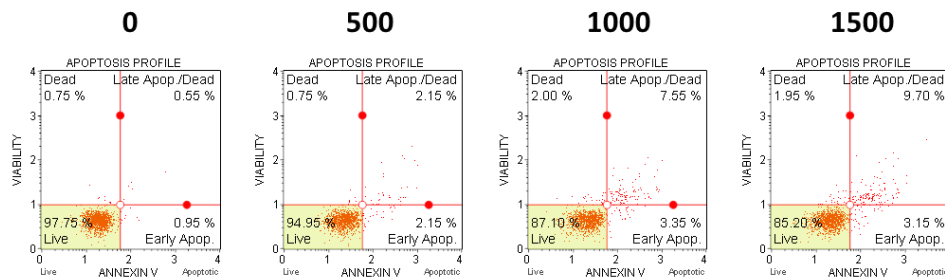

**b-AP15 (nM)**

**RT4**

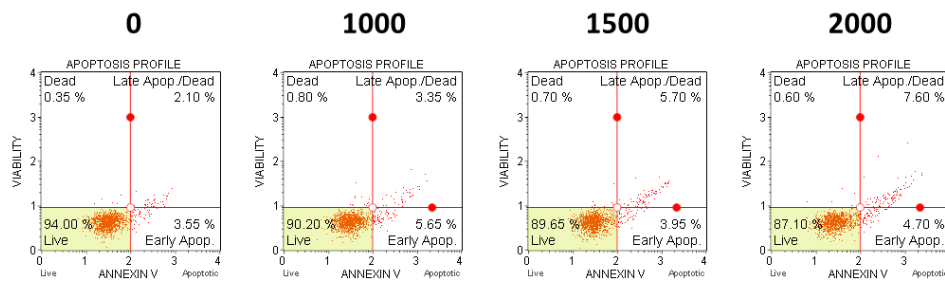

**Figure S1.**

The UC cells were treated with b-AP15 at indicated concentrations for 24 hours and the apoptotic cell population was analyzed using flow cytometry as described in Methods.

**Figure S2**

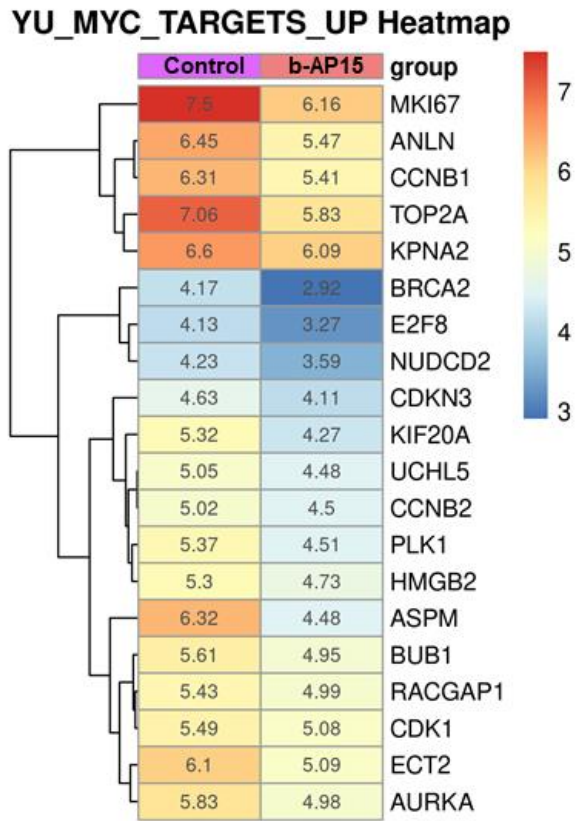

**Figure S2.**

RNA sequencing data from DMSO or b-AP15-treated T24/R cells was analyzed via gene set enrichment analysis (GSEA). Target genes enrichment scores of the GSEA YU\_MYC\_TARGETS\_UP were listed in this heatmap.

**Figure S3**

**LI\_CISPLATIN\_RESISTANCE\_UP Heatmap**

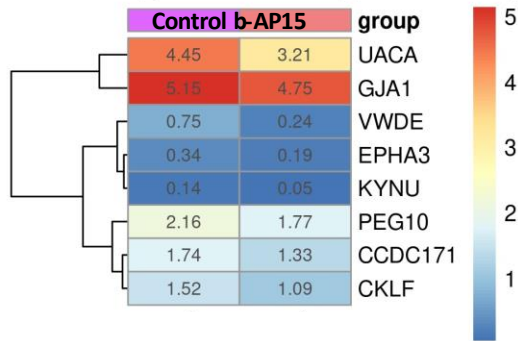

**Figure S3.**

RNA sequencing data from DMSO or b-AP15-treated T24/R cells was analyzed via gene set enrichment analysis (GSEA). Target genes enrichment scores of the GSEA LI\_CISPLATIN\_RESISTANCE\_UP were listed in this heatmap.

**Figure S4**

**JAATINEN\_HEMATOPOIETIC\_STEM\_CELL\_UP Heatmap**

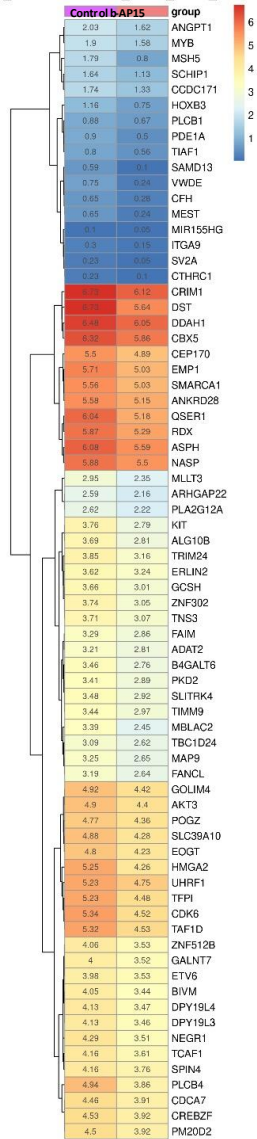

**Figure S4.**

RNA sequencing data from DMSO or b-AP15-treated T24/R cells was analyzed via gene set enrichment analysis (GSEA). Target genes enrichment scores of the GSEA JAATINEN\_HEMATOPOIETIC\_STAM\_CELL\_UP were listed in this heatmap.

**Figure S5**

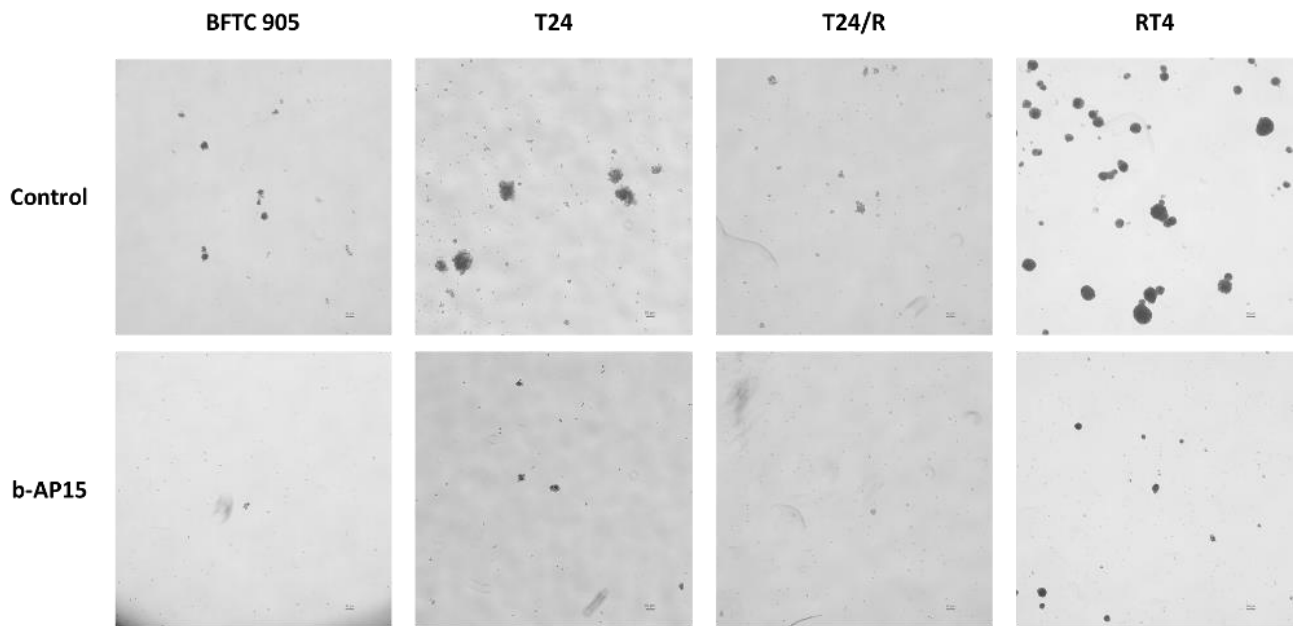

**Figure S5.**

The cells were subjected to tumorsphere cultivation assay within the treatment of DMSO (control) or low-dose b-AP15 (50 nM) for 14 days. The images were digitized at 40× magnification. Scale bars, 50  $\mu$ m.



**Figure S6**

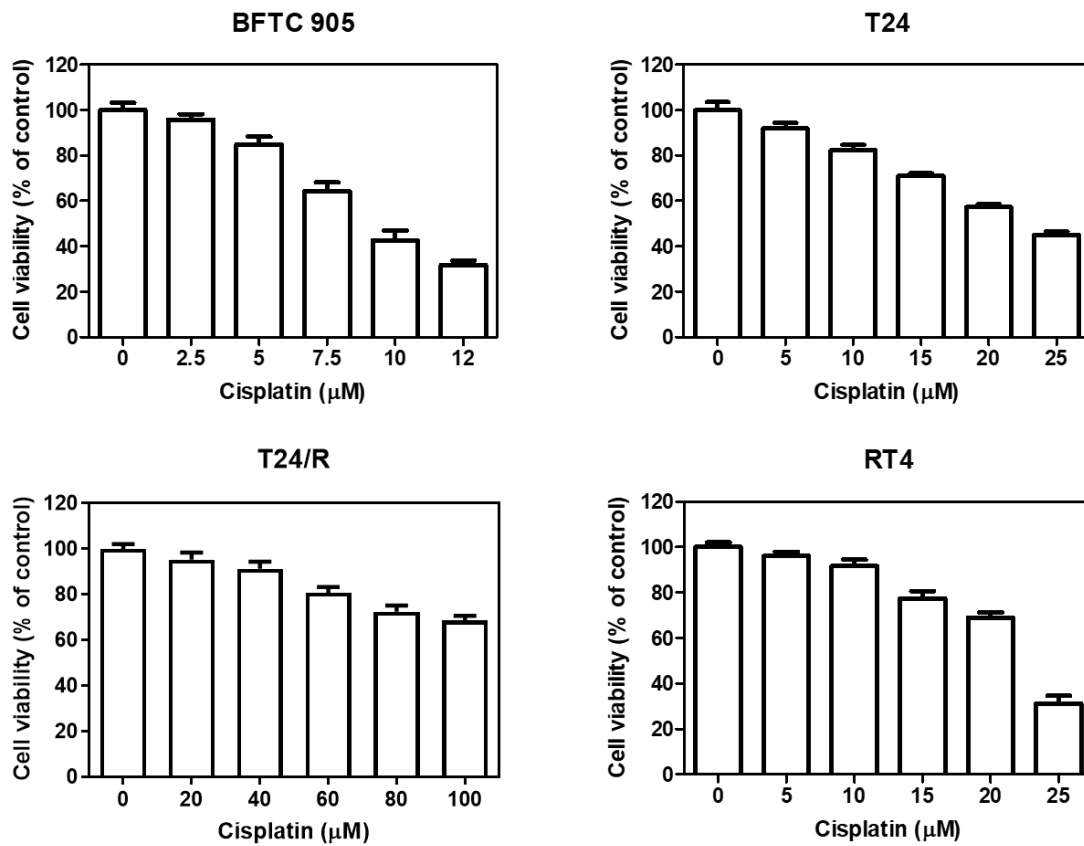

**Figure S6.**

The cells were treated with indicated concentrations of cisplatin for 24 hours, followed by the MTT assay to analyze cell viability. The following experiments which combined b-AP15 and cisplatin to treat the UC cells were based on these results.
